# Supplementary material for: Synthesis of α,ω-bis-Mercaptoacyl Poly(alkyl oxide)s and Development of Thioether Cross-Linked Liposome Scaffolds for Sustained Release of Drugs
Source: MDPI journal article supplement (doi:10.3390/molecules29061312), 2024-03-15
Supplement: s1 [file s1]

## SUPPORTING INFORMATION

### Synthesis of $\alpha,\omega$ -bis-Mercaptoacyl Poly(alkyl oxide)s and Development of Thioether Cross-Linked Liposome Scaffolds for Sustained Release of Drugs

**Spyridon Mourtas**<sup>1,\*</sup>, **Georgios Kourmoulakis**<sup>2</sup>, **Kremezis Stavros**<sup>2</sup>, **Pavlos Klepetsanis**<sup>2,3</sup> and  
**Sophia G. Antimisiaris**<sup>2,3,\*</sup>

<sup>1</sup> Department of Chemistry, University of Patras, 26510 Rio Patras, Greece

<sup>2</sup> Laboratory of Pharmaceutical Technology, Department of Pharmacy, School of Health Sciences, University of Patras, 26510 Rio Patras, Greece; geokourmoulakis93@gmail.com (G.K.); stauros\_chemeng@yahoo.com (S.K.); klepe@upatras.gr (P.K.)

<sup>3</sup> Institute of Chemical Engineering Sciences, Foundation for Research and Technology Hellas (FORTH/ICES), 26504 Rio Patras, Greece

\* Correspondence: s.mourtas@upatras.gr (S.M.); santimis@upatras.gr (S.G.A.);  
Tel.: +30-2610-996-015 (S.M.); +30-2610-962-332 (S.G.A.)

# 1. NMR spectra, HPLC analysis of *S*-Mmt-mercapto acids

## 1.1 *S*-Mmt-2-mercaptopropionic acid (thiolactic acid) (**6a**)

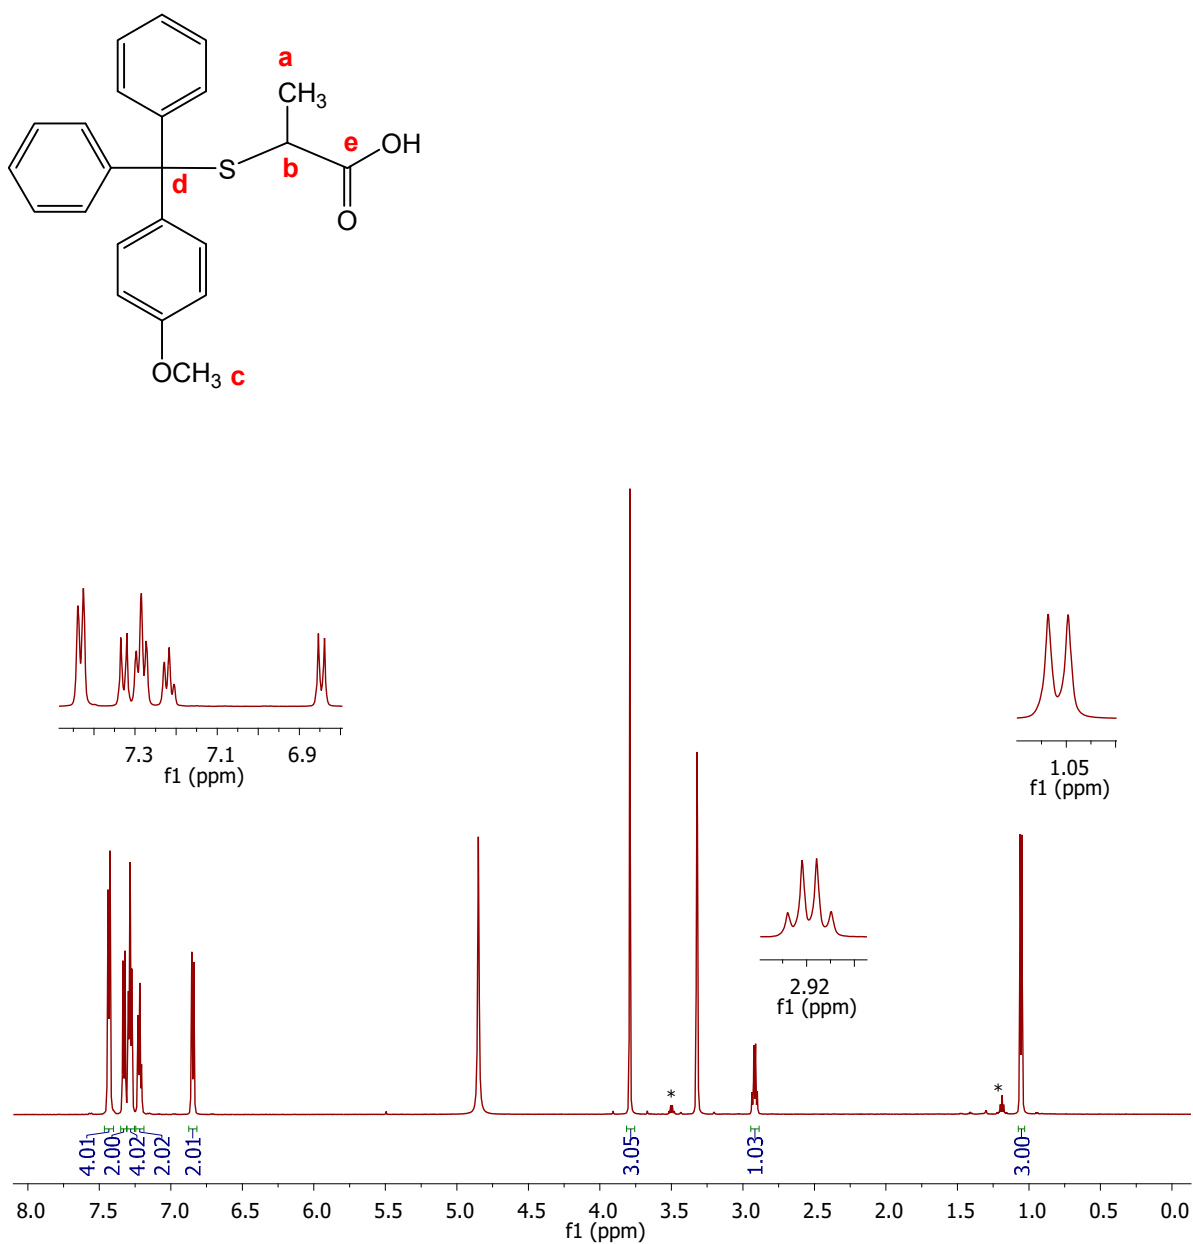

**Figure S1.** <sup>1</sup>H-NMR of *S*-Mmt-2-mercaptopropionic acid (thiolactic acid) (**6a**) in methanol-*d*<sub>4</sub>.  
\*solvent residue

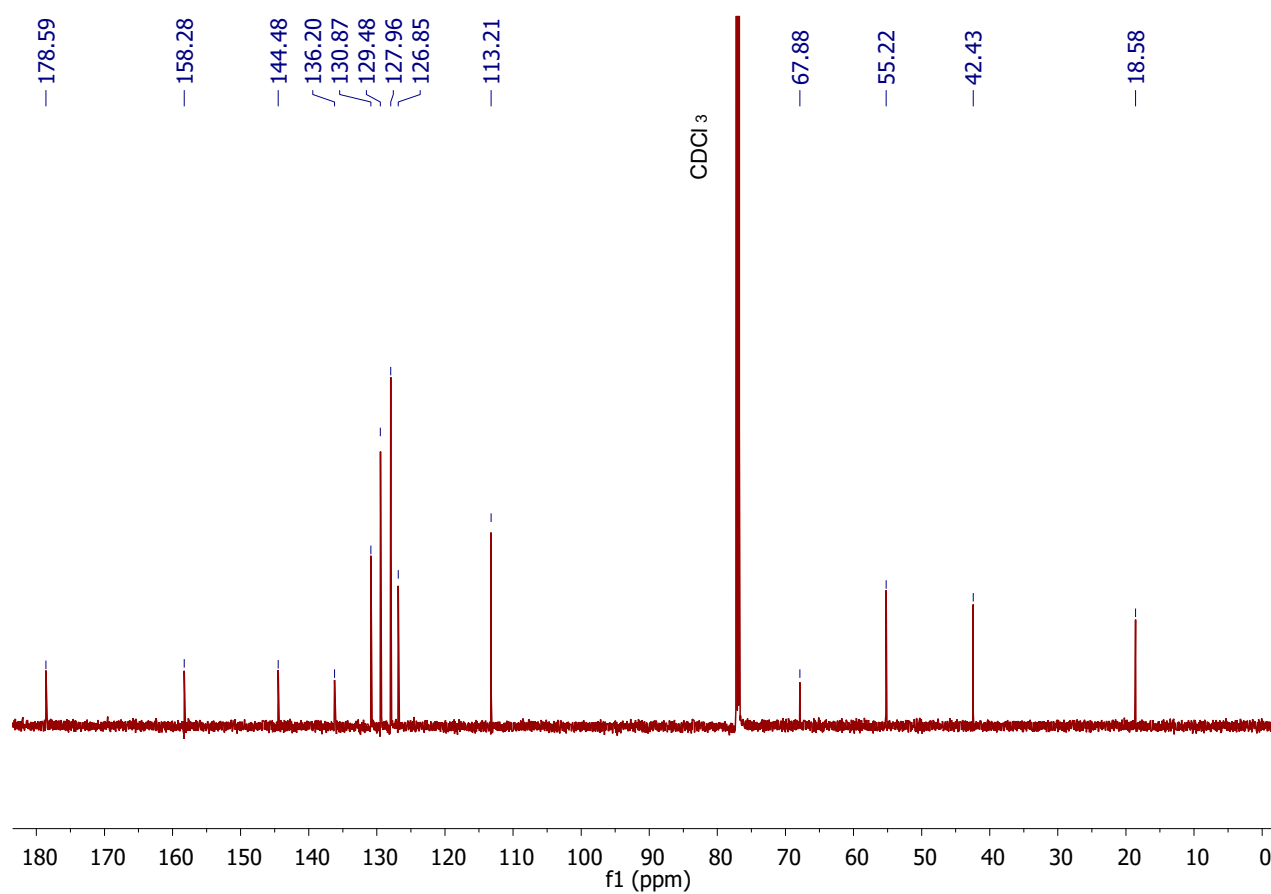

**Figure S2.** <sup>13</sup>C-NMR of *S*-Mmt-2-mercaptopropionic acid (thiolactic acid) (**6a**) in CDCl<sub>3</sub>

## 1.2 *S*-Mmt-3-mercaptopropionic acid (**6b**)

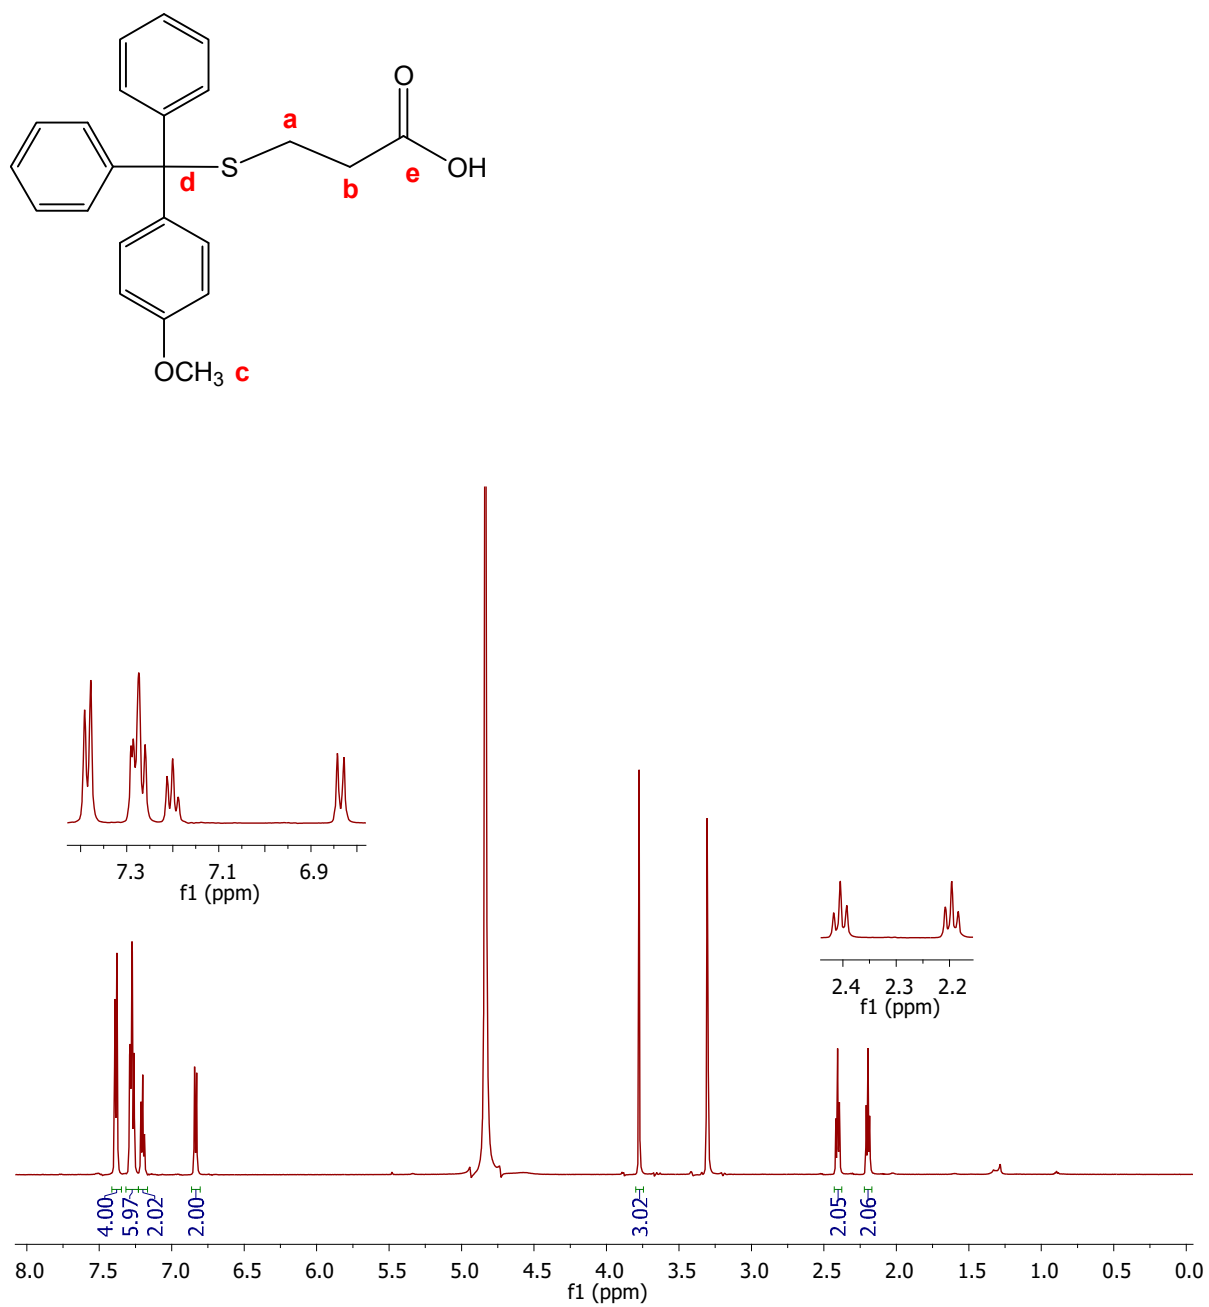

**Figure S3.** <sup>1</sup>H-NMR of *S*-Mmt-3-mercaptopropionic acid (**6b**) in methanol-*d*<sub>4</sub>.

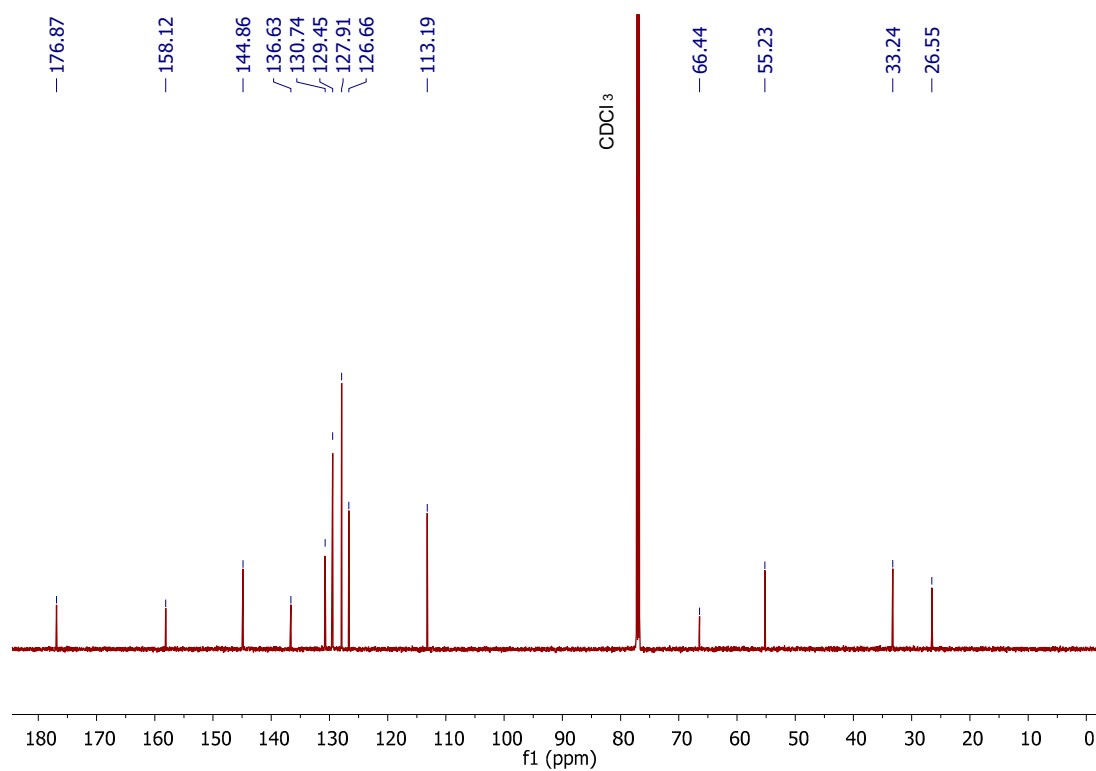

**Figure S4.** <sup>13</sup>C-NMR of *S*-Mmt-3-mercaptopropionic acid (**6b**) in CDCl<sub>3</sub>.

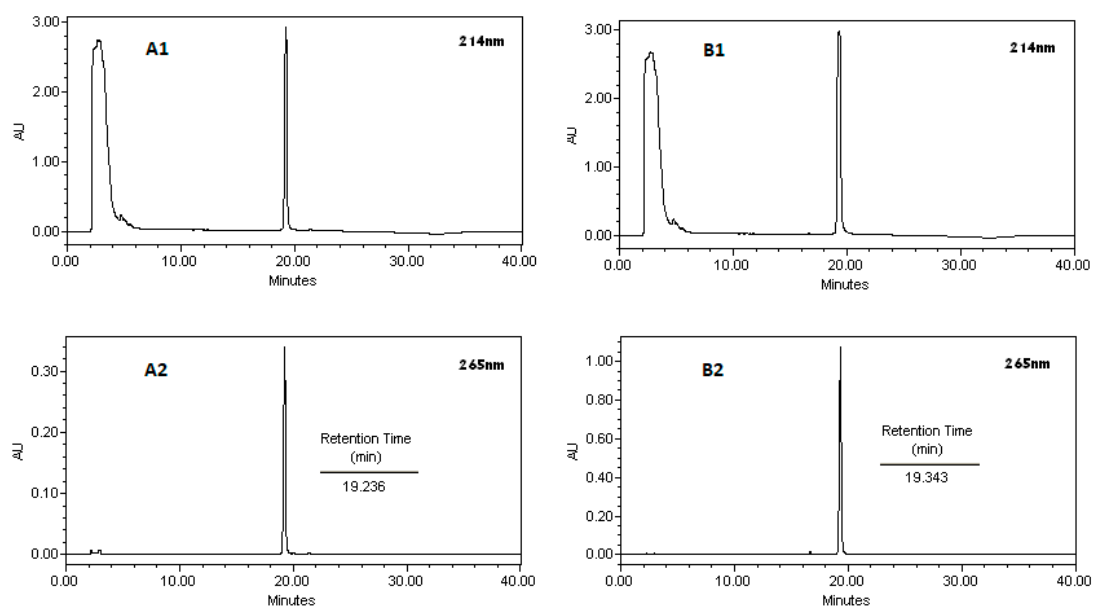

**Figure S5.** Analytical hplc of *S*-Mmt-2-mercaptopropionic acid (thiolactic acid) (**6a**) (A1, A2) and *S*-Mmt-3-mercaptopropionic acid (**6b**) (B1, B2) at 214 and 265 nm; column: LiChrospher 100, RP-18, 250-4, 5  $\mu$ m; mobile phase solvents: AcCN/water (0.08% TFA); Gradient conditions: 20% to 100% AcCN in 30 min.

## 2. NMR spectra of $\alpha,\omega$ -bis-mercaptopropionyl poly(ethylene oxide)s

### 2.1 di-S-Mmt-di-2-mercaptopropionyl PEG10.000 (14)

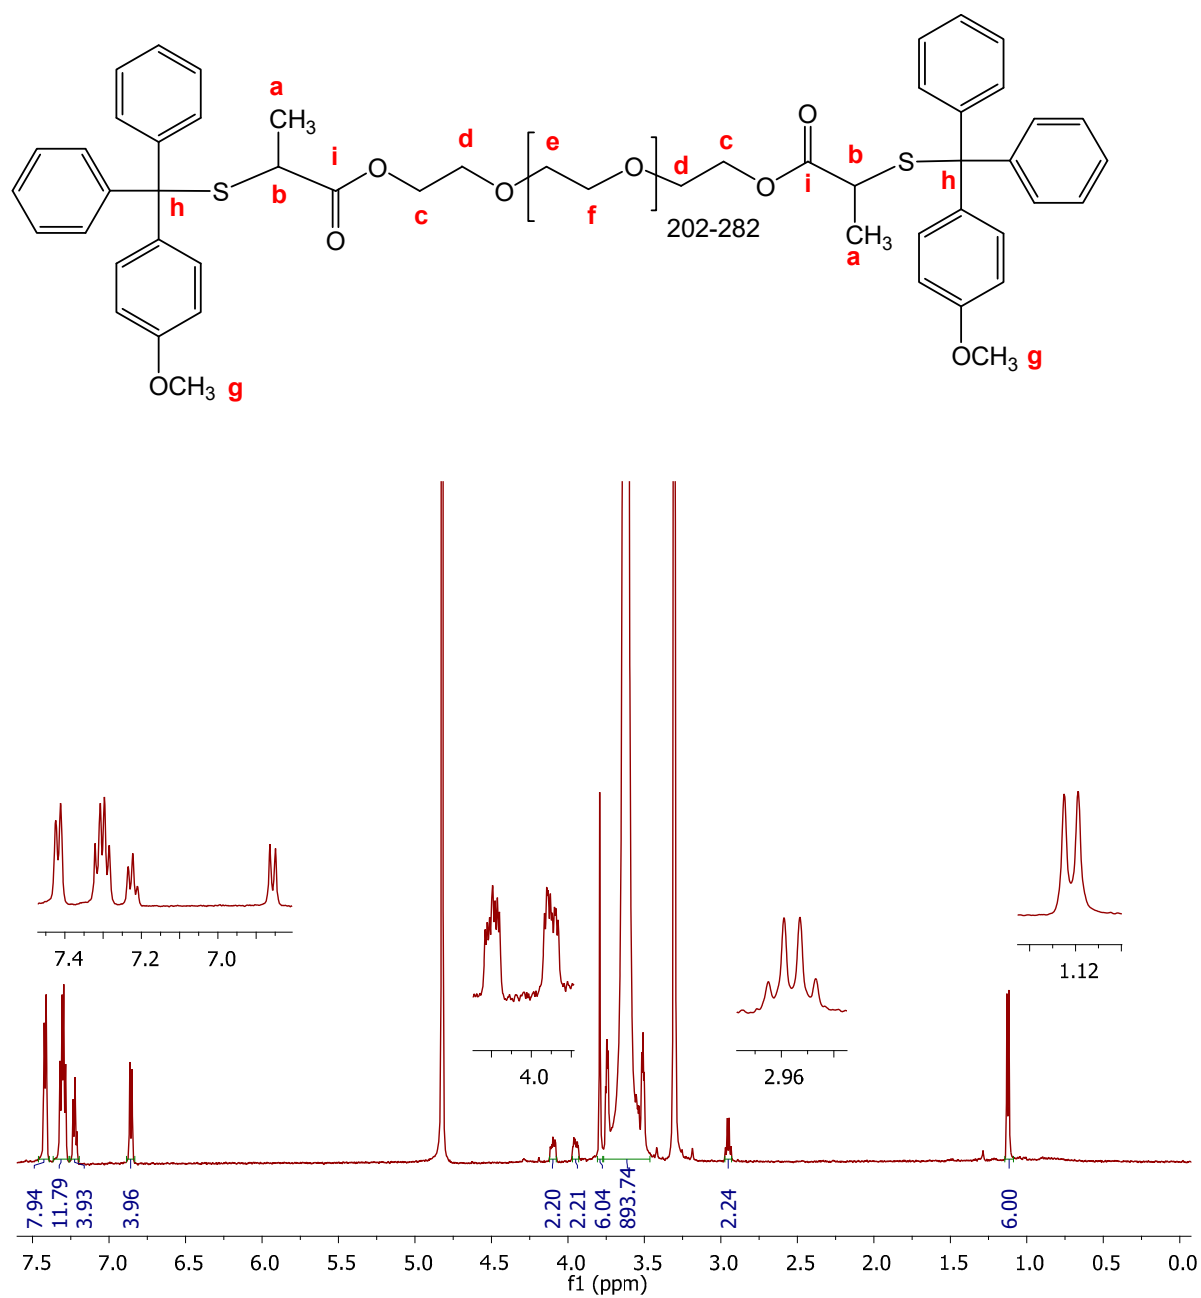

**Figure S6.** <sup>1</sup>H-NMR of di-S-Mmt-di-2-mercaptopropionyl PEG10.000 (14) in methanol-*d*<sub>4</sub>.

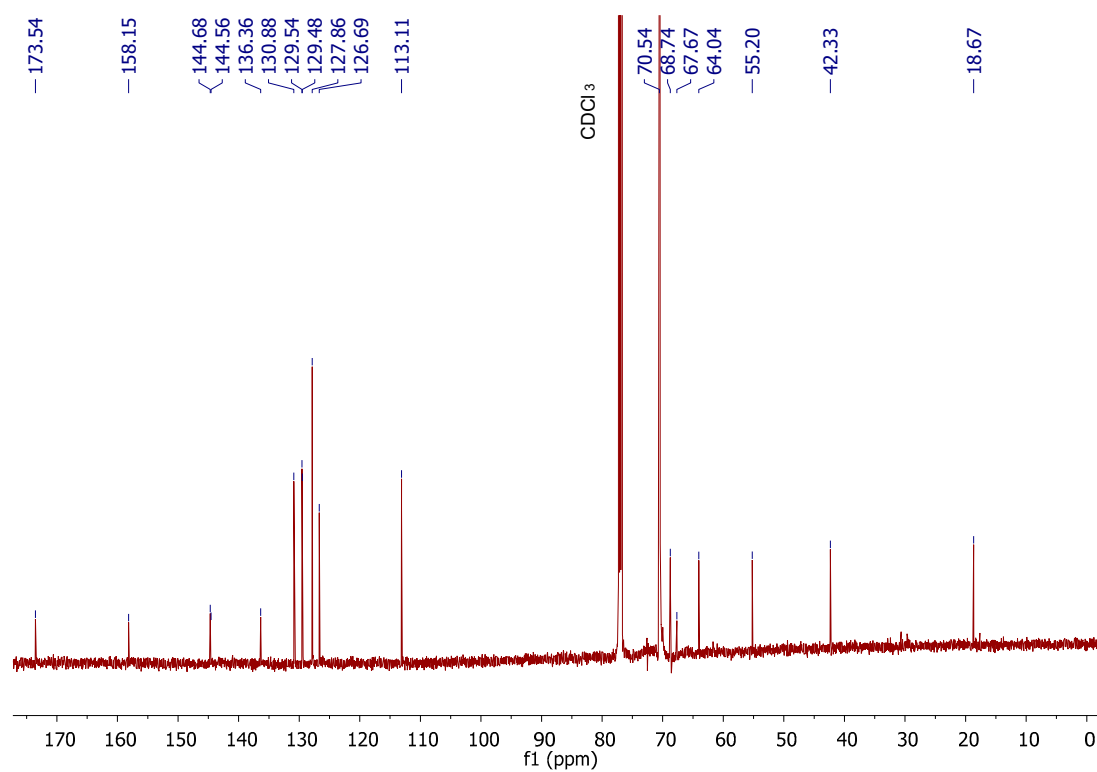

**Figure S7.**  $^{13}\text{C}$ -NMR of di-*S*-Mmt-di-2-mercaptopropionyl PEG10.000 (**14**) in  $\text{CDCl}_3$



**2.2 di-2-mercaptopropionyl PEG10.000 (17)**

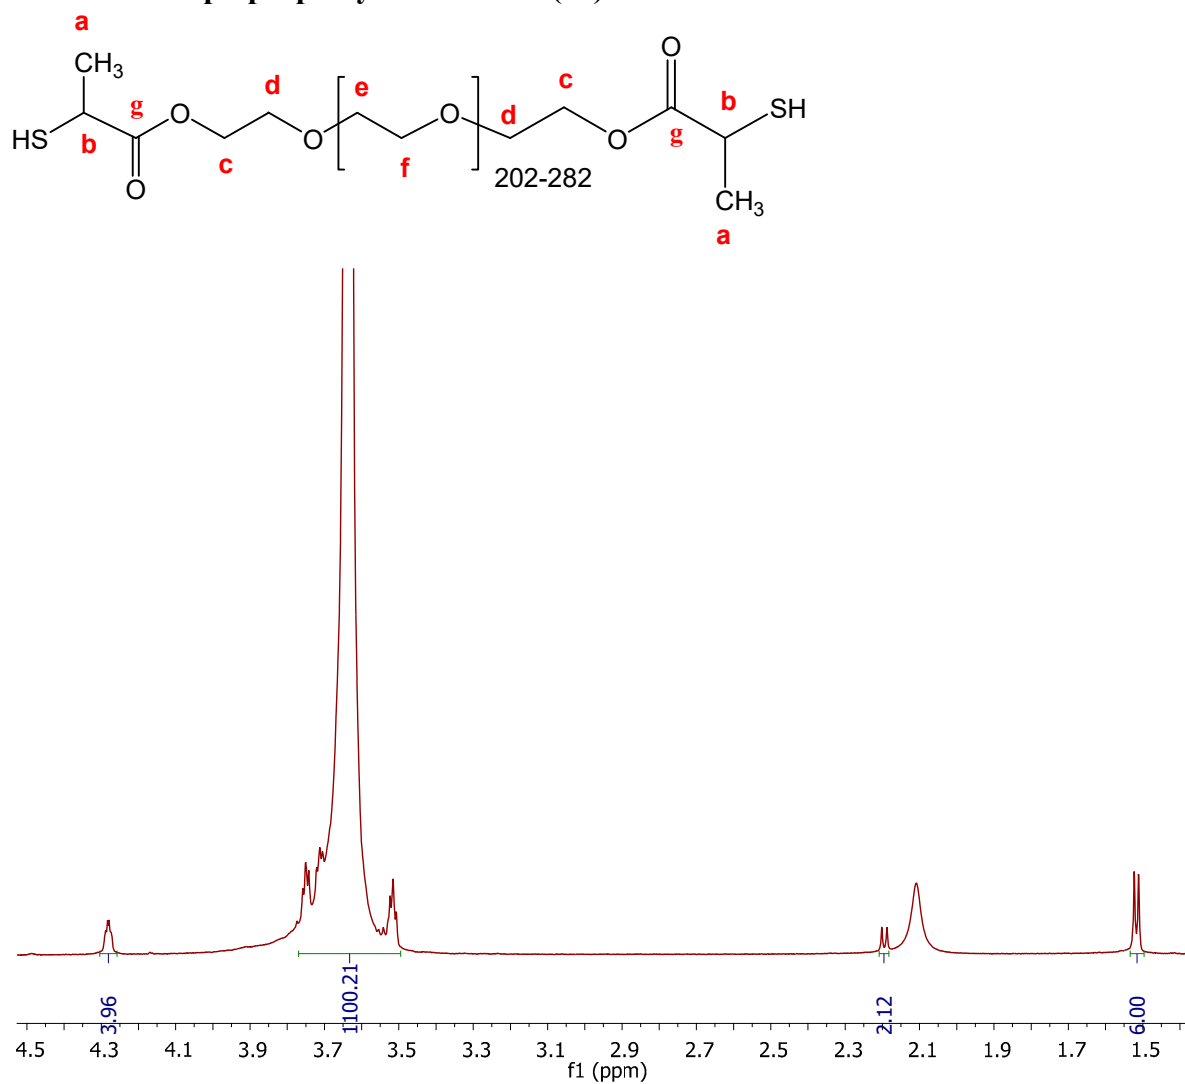

**Figure S8.** <sup>1</sup>H-NMR of di-2-mercaptopropionyl PEG10.000 (17) in CDCl<sub>3</sub>.

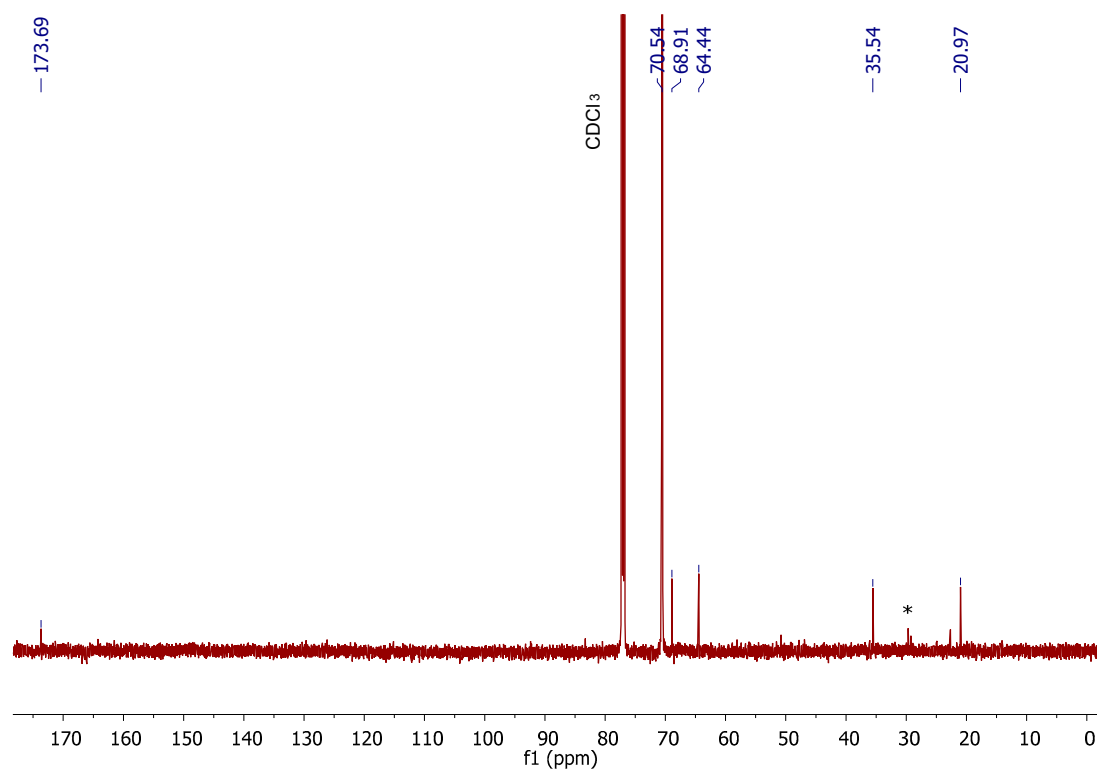

**Figure S9.** <sup>13</sup>C-NMR of di-2-mercaptopropionyl PEG10.000 (**17**) in CDCl<sub>3</sub>; \* solvent residue

### 2.3 di-*S*-Mmt-di-2-mercaptopropionyl PEG4.000 (15)

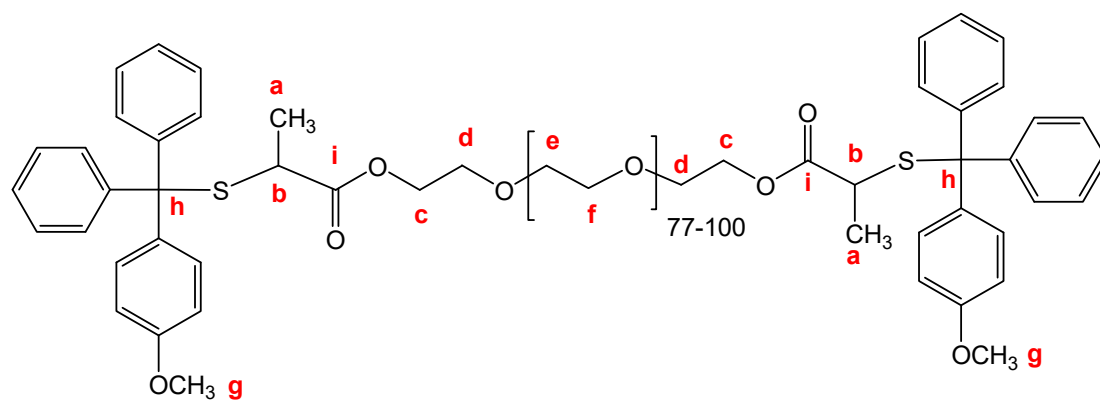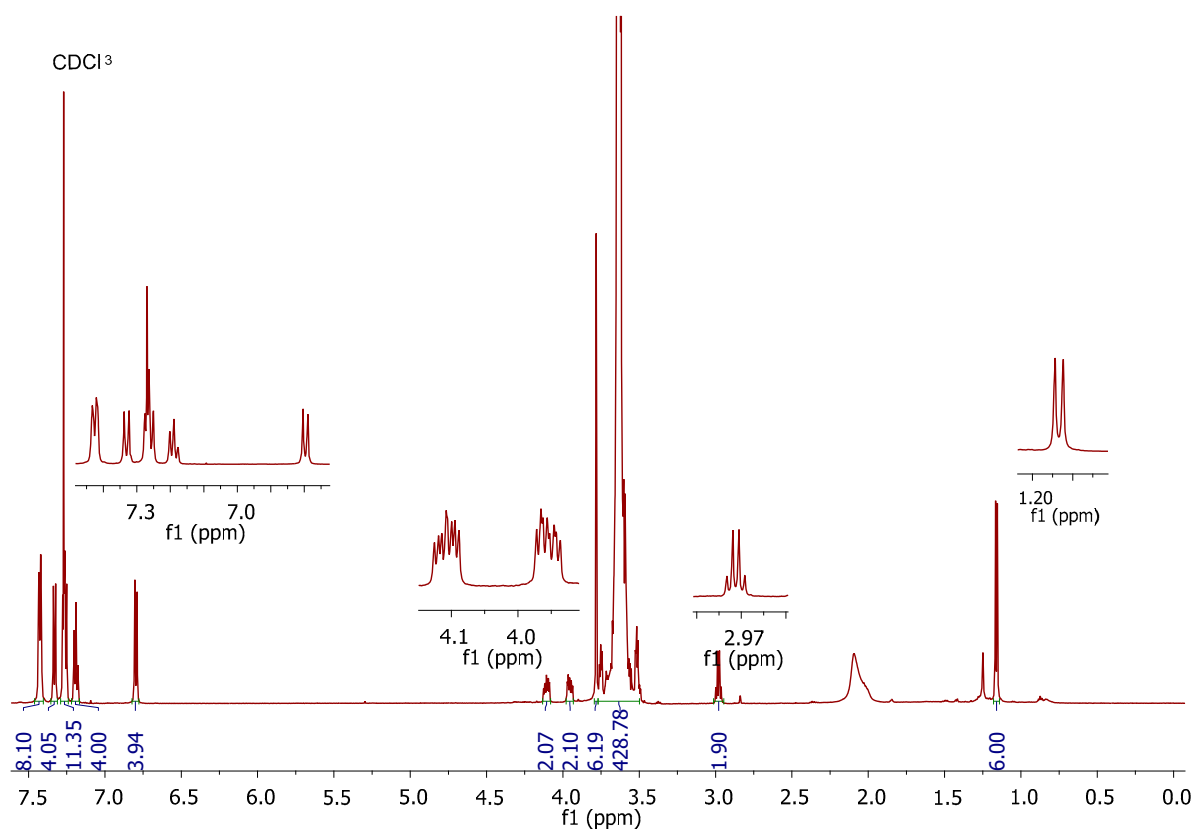

**Figure S10.** <sup>1</sup>H-NMR of di-*S*-Mmt-2-mercaptopropionyl PEG4.000 (15) in CDCl<sub>3</sub>.

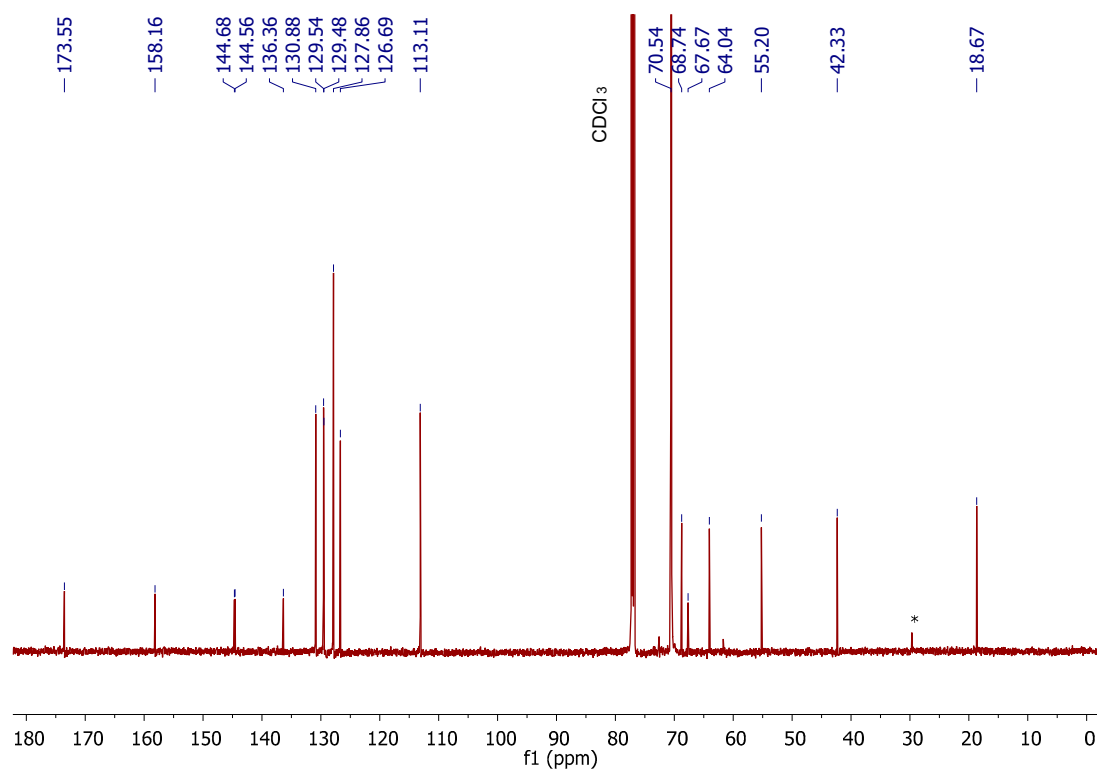

**Figure S11.** <sup>13</sup>C-NMR of di-S-Mmt-2-mercaptopropionyl PEG4.000 (**15**) in CDCl<sub>3</sub>;  
\* solvent residue

**2.4 di-2-mercaptopropionyl PEG4.000 (18)**

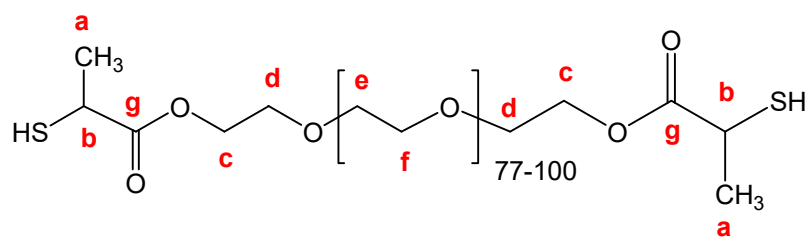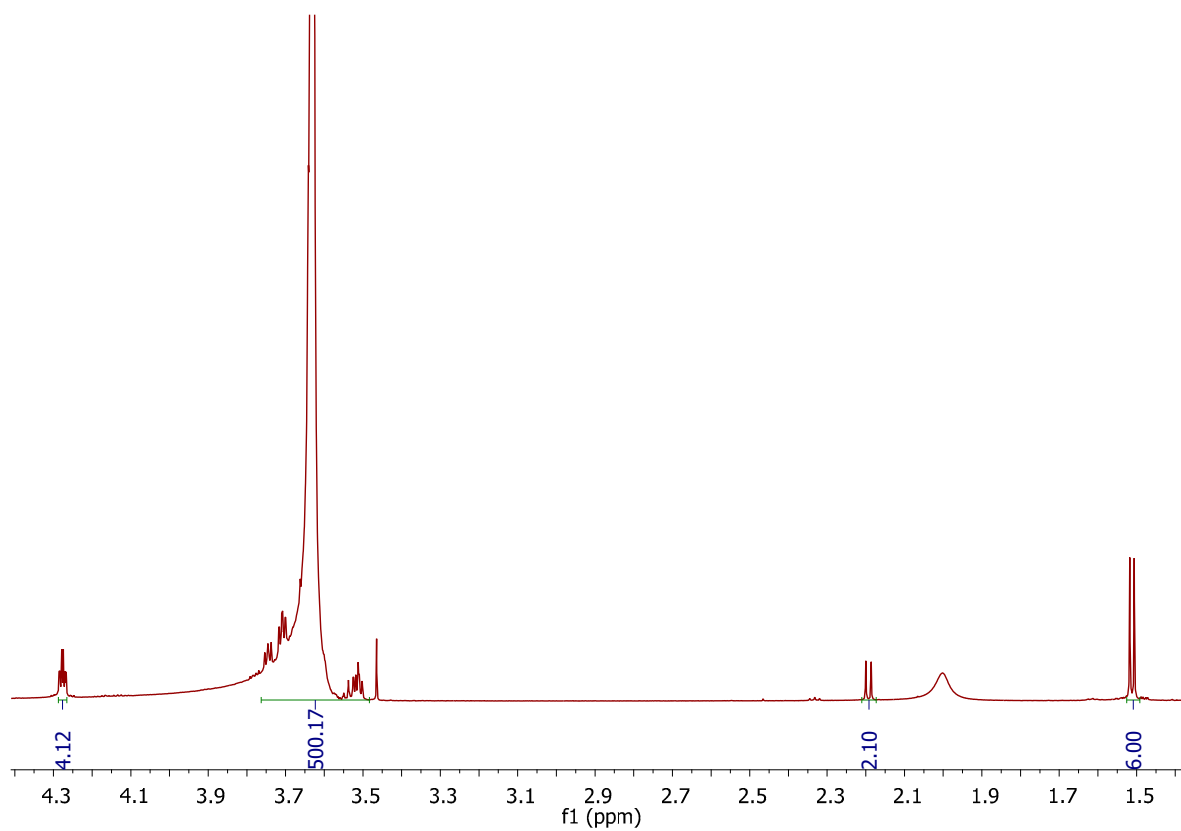

**Figure S12.** <sup>1</sup>H-NMR of di-2-mercaptopropionyl PEG4.000 (**18**) in CDCl<sub>3</sub>.

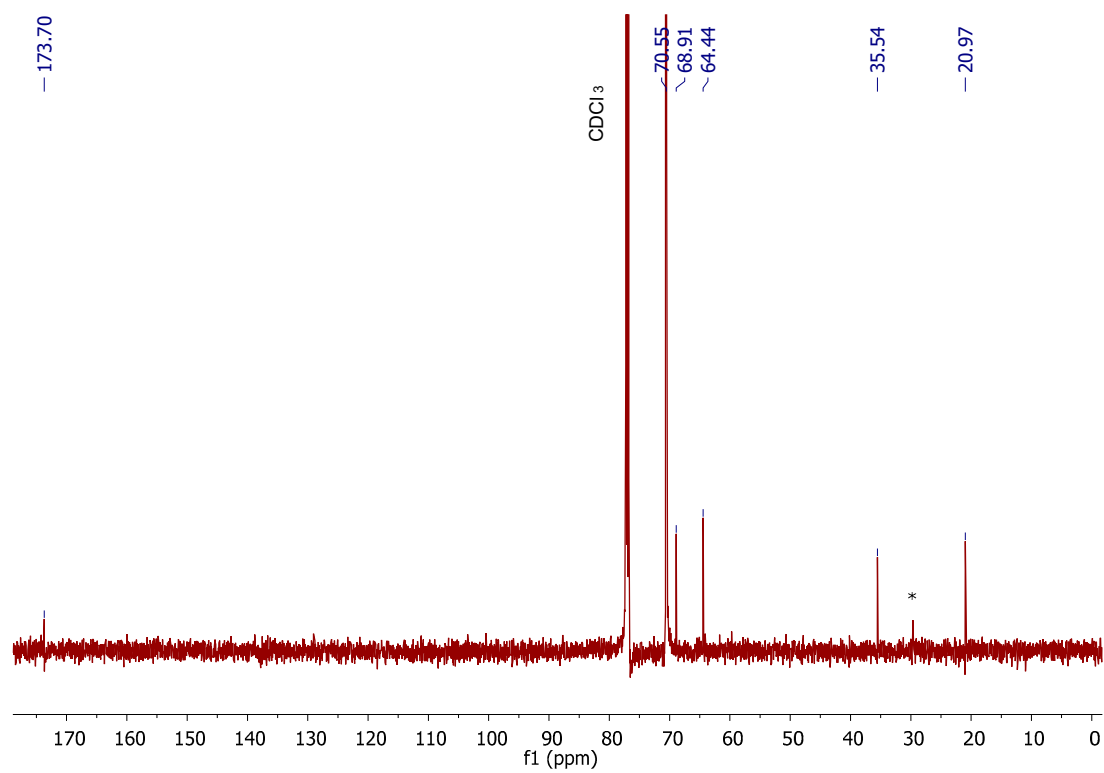

**Figure S13.** <sup>1</sup>H-NMR of di-2-mercaptopropionyl PEG4.000 (**18**) in CDCl<sub>3</sub>; \* solvent residue

**2.5 di-2-mercaptopropionyl PEG1.000 (19)**

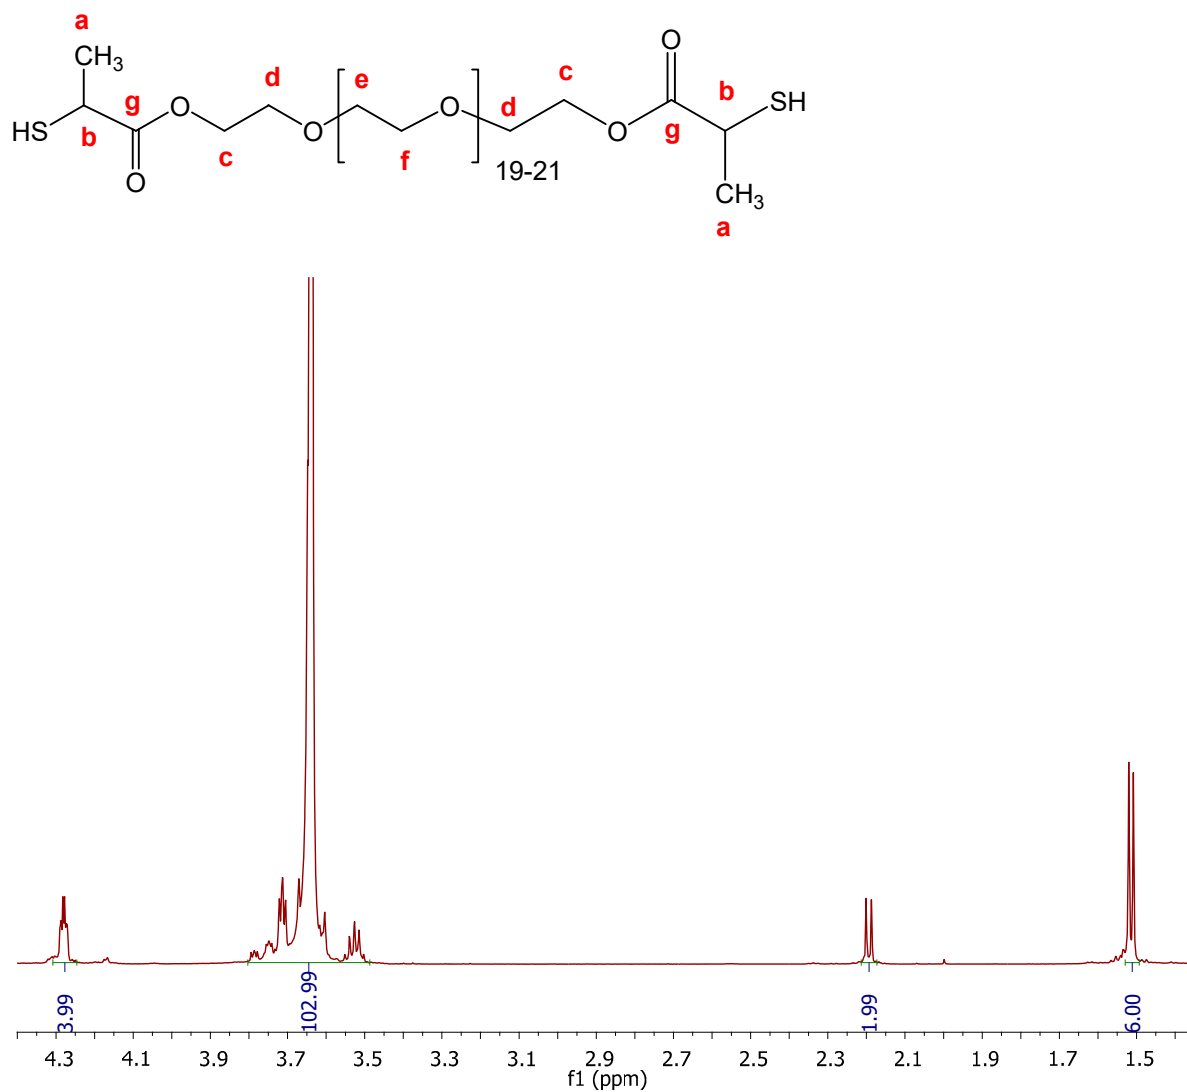

**Figure S14.** <sup>1</sup>H-NMR of di-2-mercaptopropionyl PEG1.000 (19) in CDCl<sub>3</sub>.

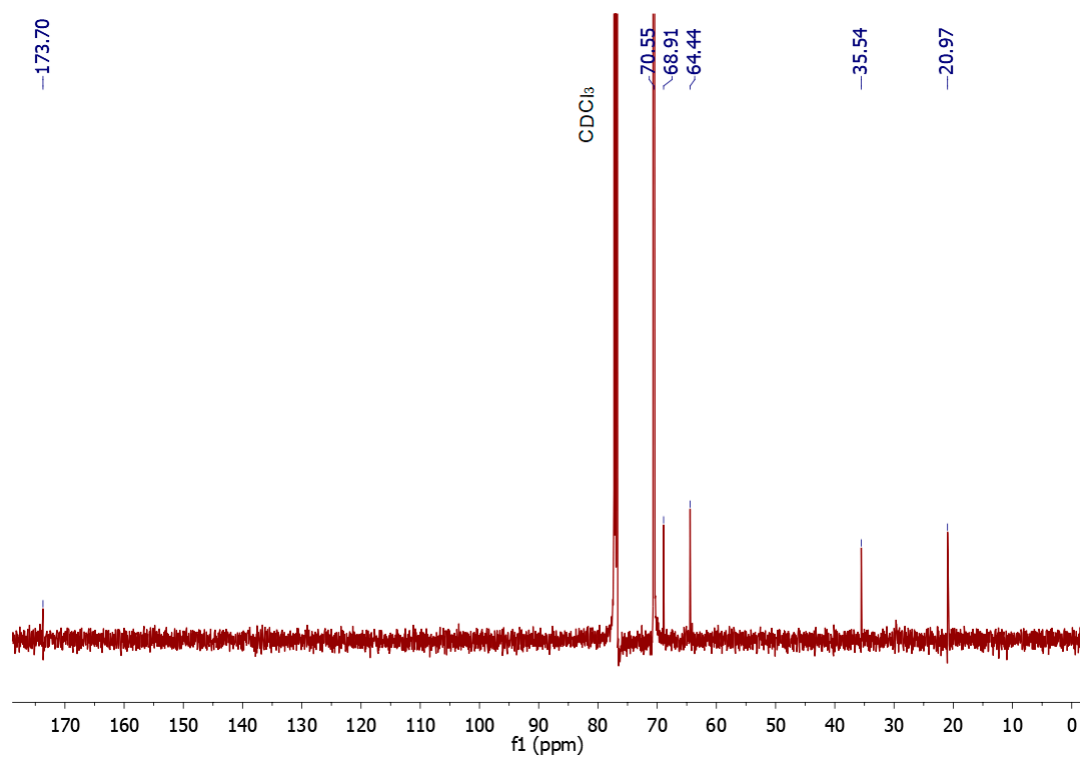

**Figure S15.**  $^1\text{H}$ -NMR of di-2-mercaptopropionyl PEG1.000 (**19**) in  $\text{CDCl}_3$ .



### 3. ESI-MS spectra of $\alpha,\omega$ -bis-mercaptoacyl poly(ethylene oxide)s

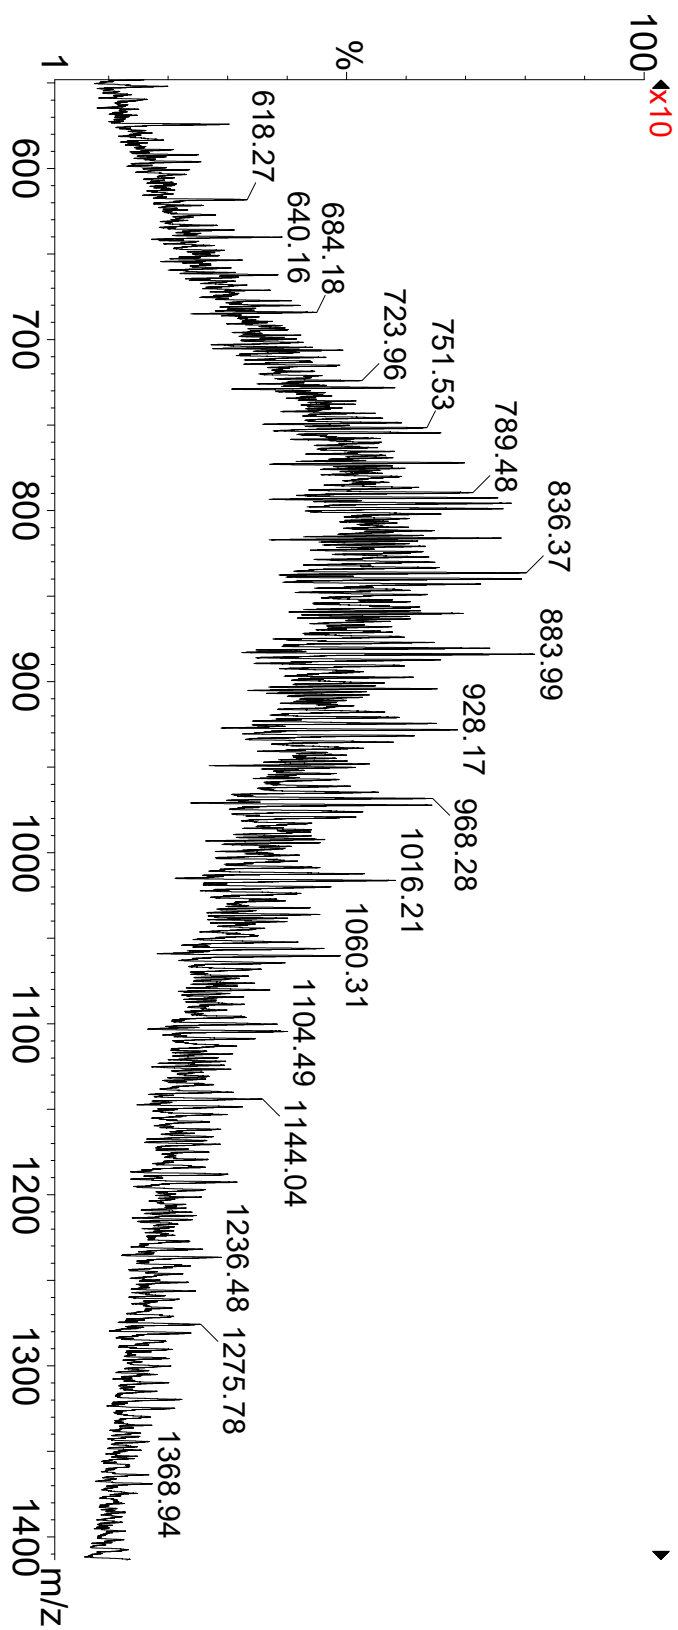

**Figure S16.** ESI-MS of di-2-mercaptopropionyl PEG10.000 (17);  $(M + 12H)/12$ .

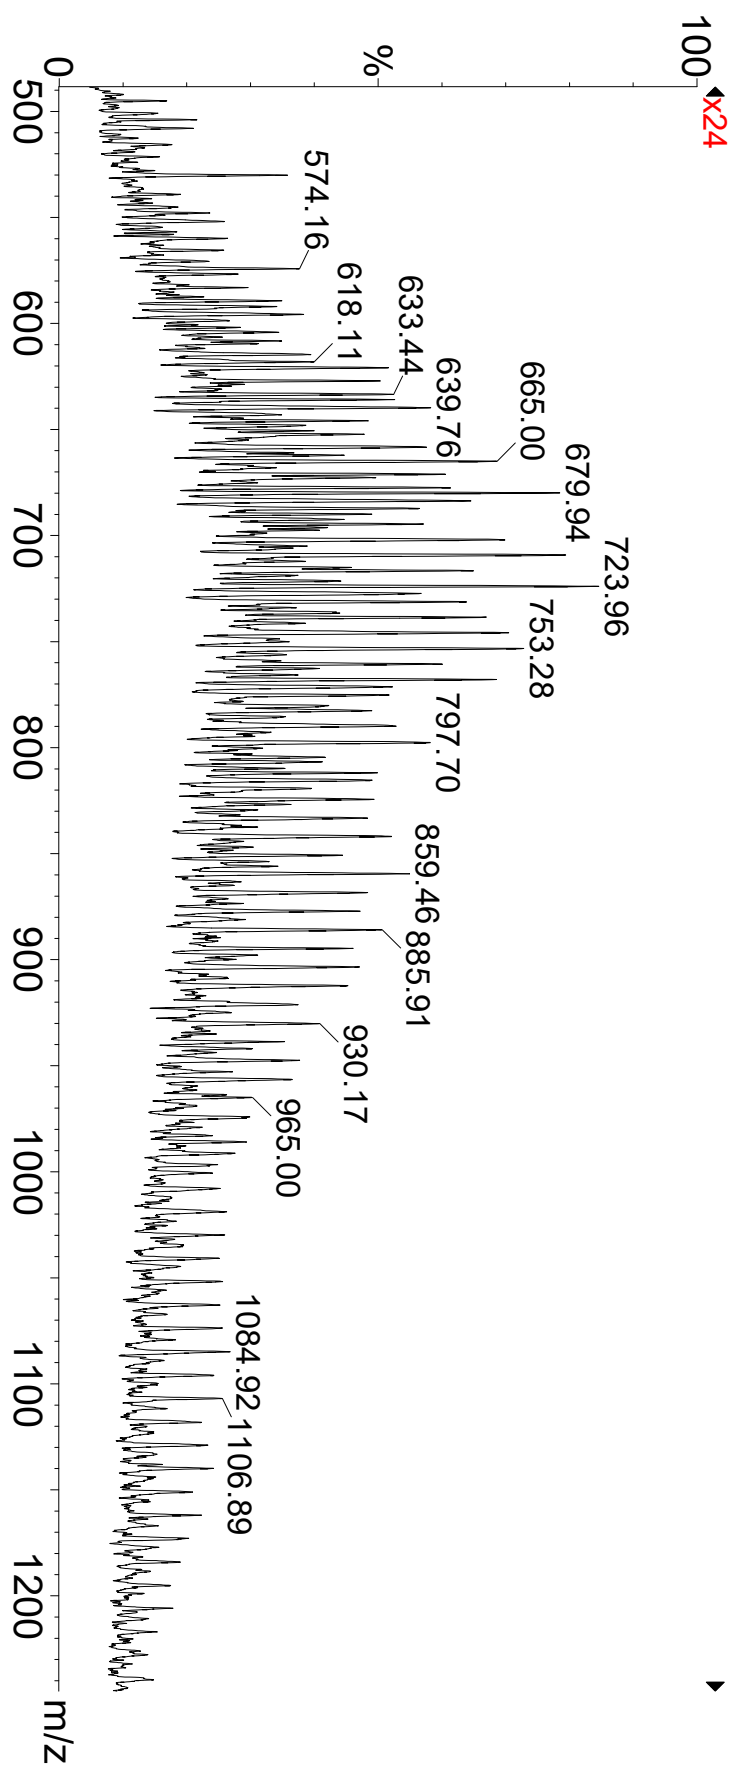

**Figure S17.** ESI-MS of di-2-mercaptopropionyl PEG4.000 (**18**);  $(M + 6H)/6$ .

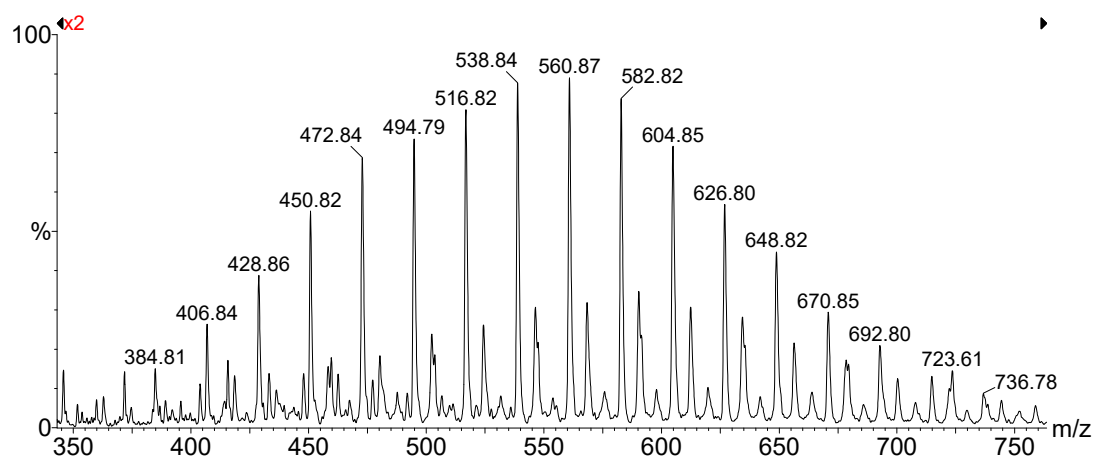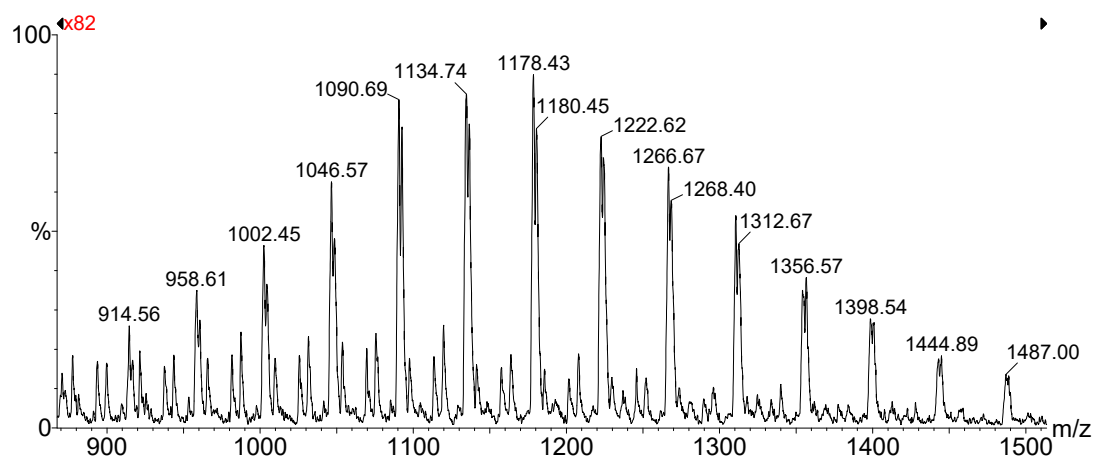

**Figure S18.** ESI-MS of di-2-mercaptopropionyl PEG1.000 (19);  $(M + 2H)/2$ ,  $M + H$ .

## 4. NMR spectra of $\alpha,\omega$ -bis-mercaptoacyl pluronic

### 4.1 di-*S*-Mmt-di-3-mercaptopropionyl pluronic (20)

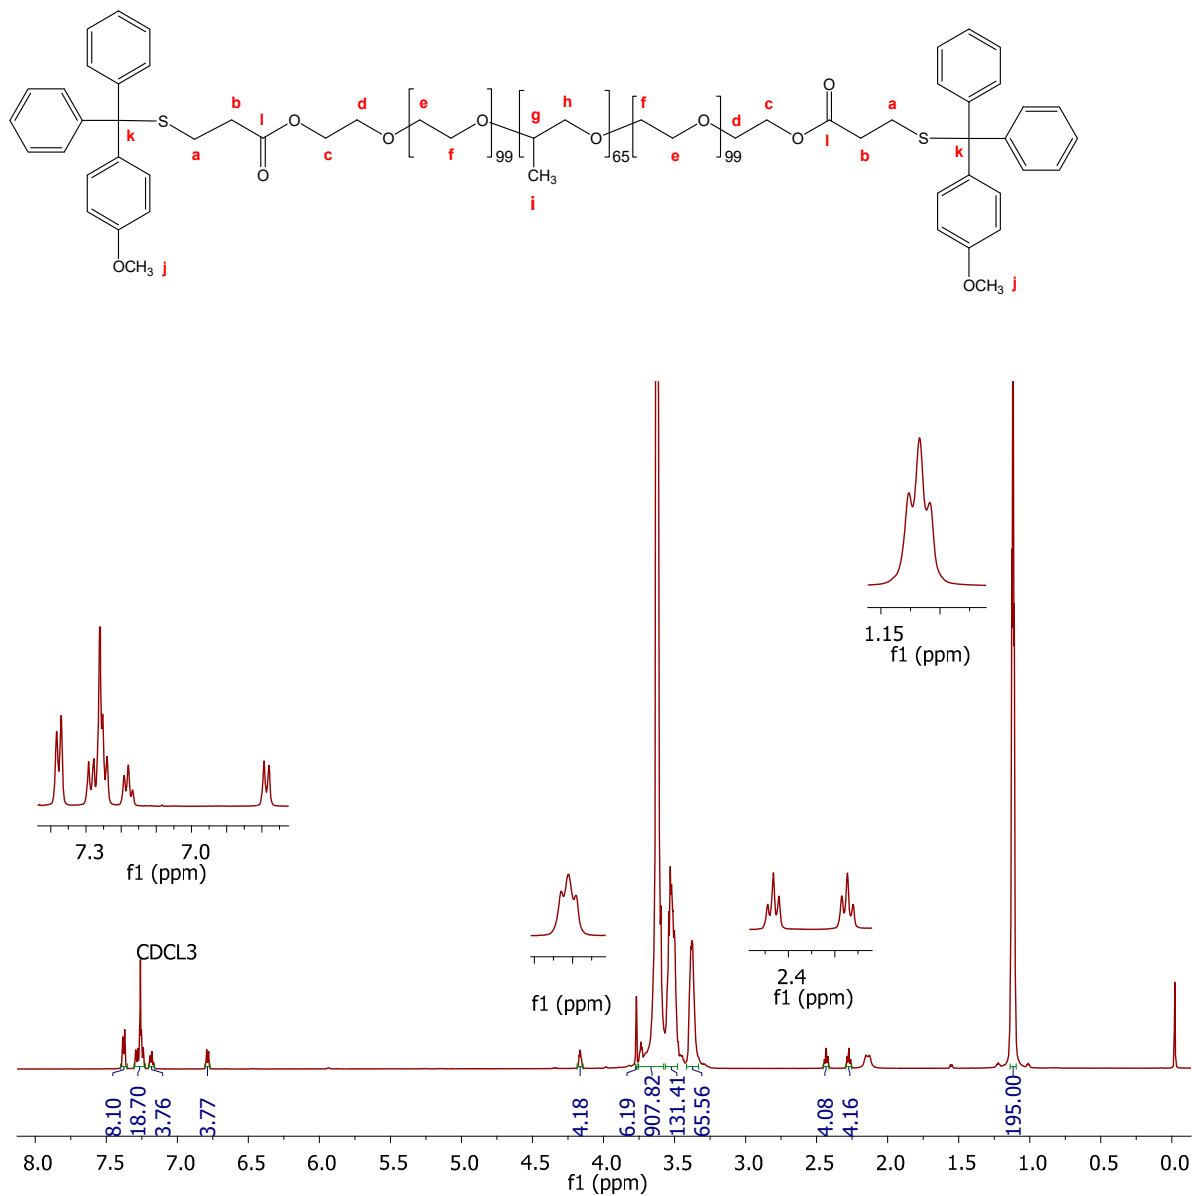

**Figure S19.** <sup>1</sup>H-NMR of di-*S*-Mmt-di-3-mercaptopropionyl pluronic (20) in CDCl<sub>3</sub>.

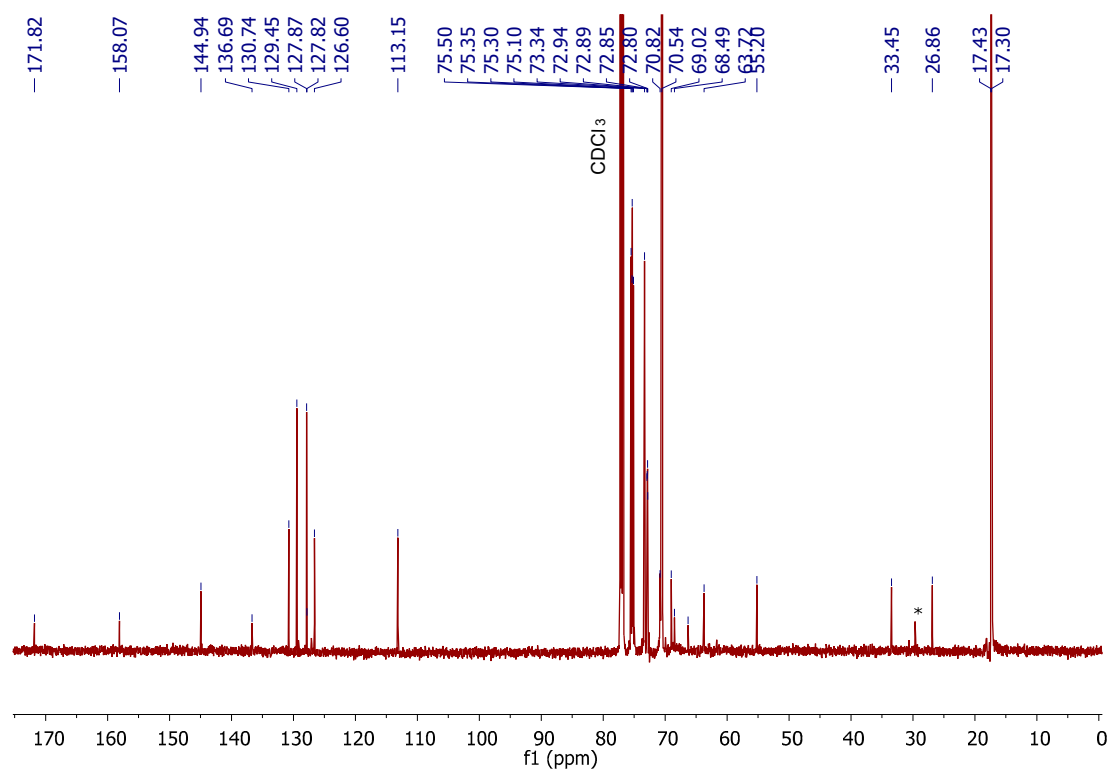

**Figure S20.** <sup>13</sup>C-NMR of di-S-Mmt-di-3-mercaptopropionyl pluronic (**20**) in CDCl<sub>3</sub>;  
\* solvent residue

## 4.2 di-3-mercaptopropionyl pluronic (21)

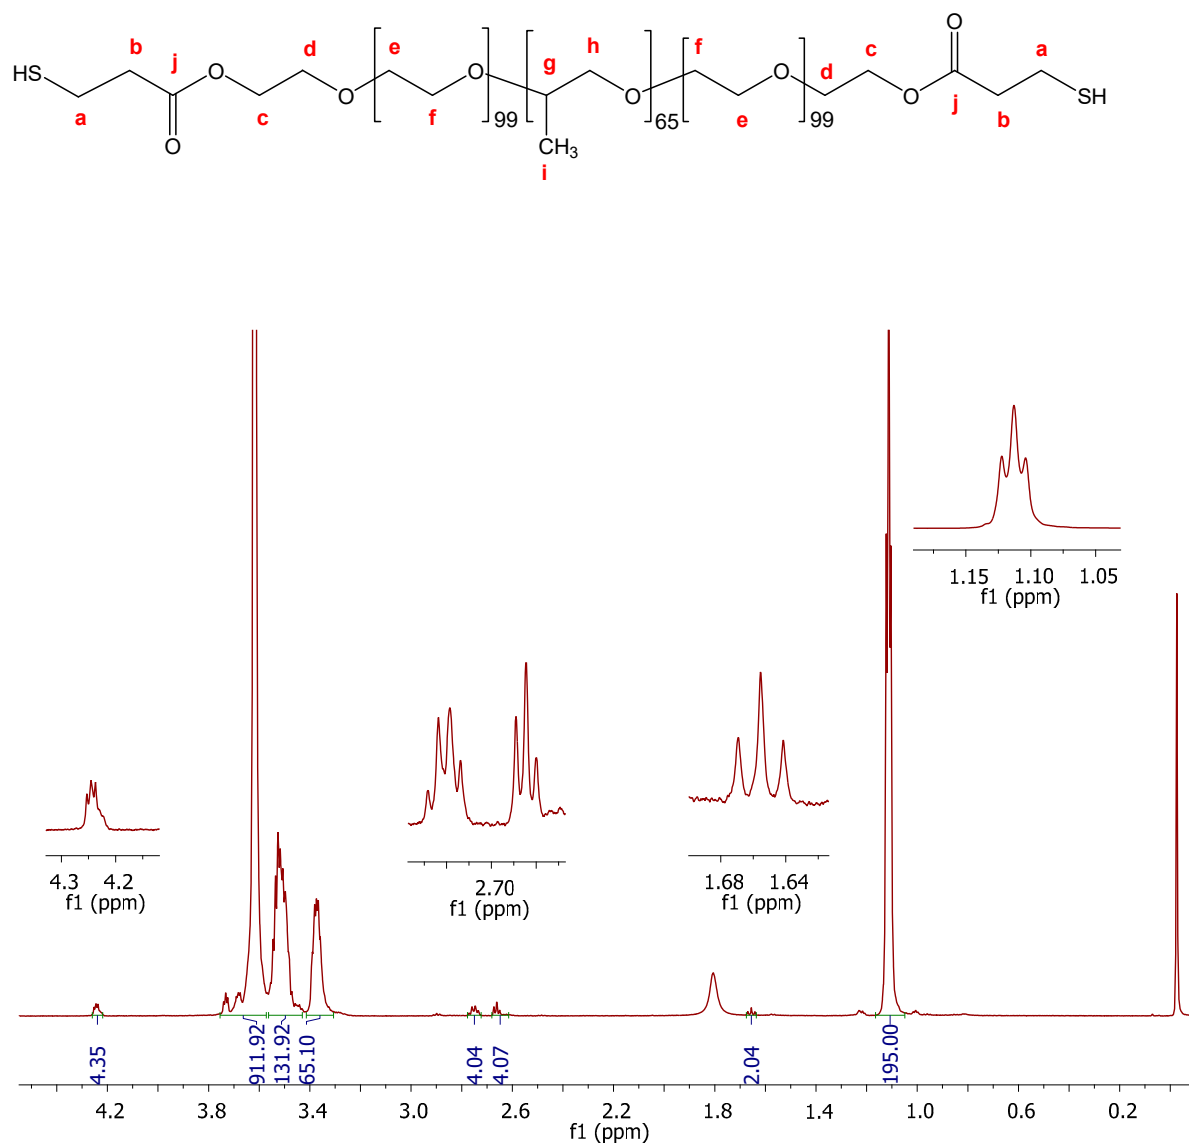

**Figure S21.**  $^1\text{H}$ -NMR of di-3-mercaptopropionyl pluronic (21) in  $\text{CDCl}_3$ .

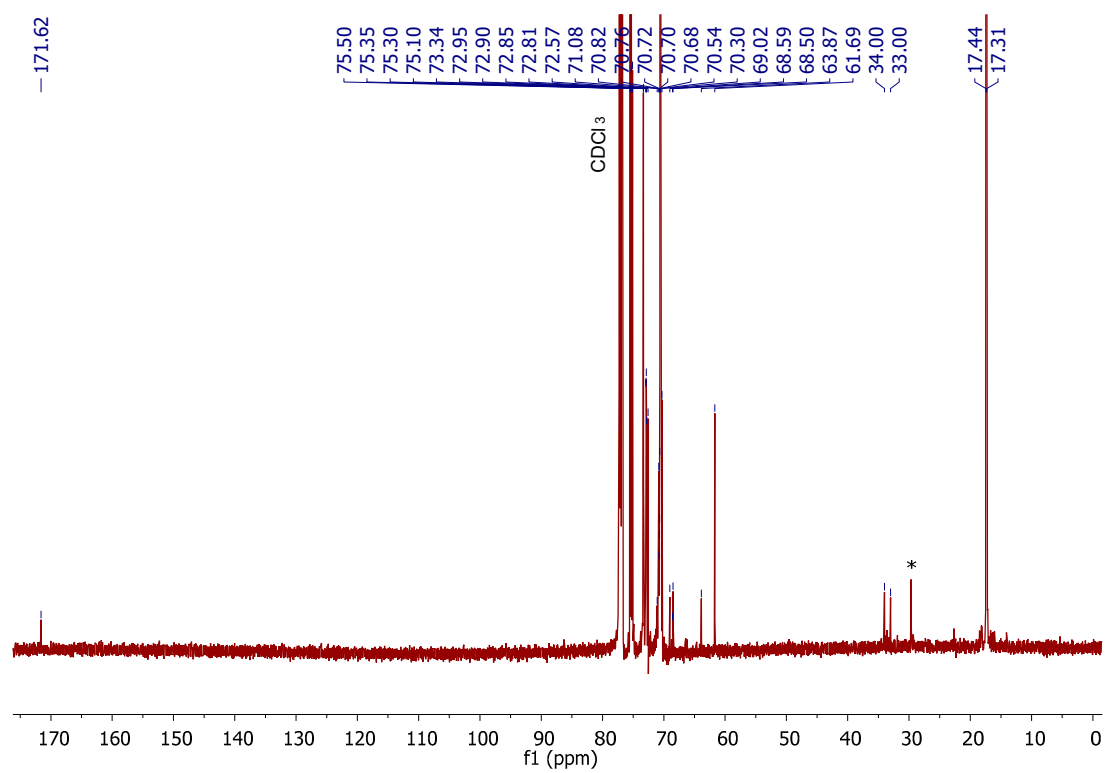

**Figure S22.** <sup>13</sup>C-NMR of di-3-mercaptopropionyl pluronic (**21**) in CDCl<sub>3</sub>; \* solvent residue

## 5. ESI-MS spectra of $\alpha,\omega$ -bis-mercaptoacyl pluronic

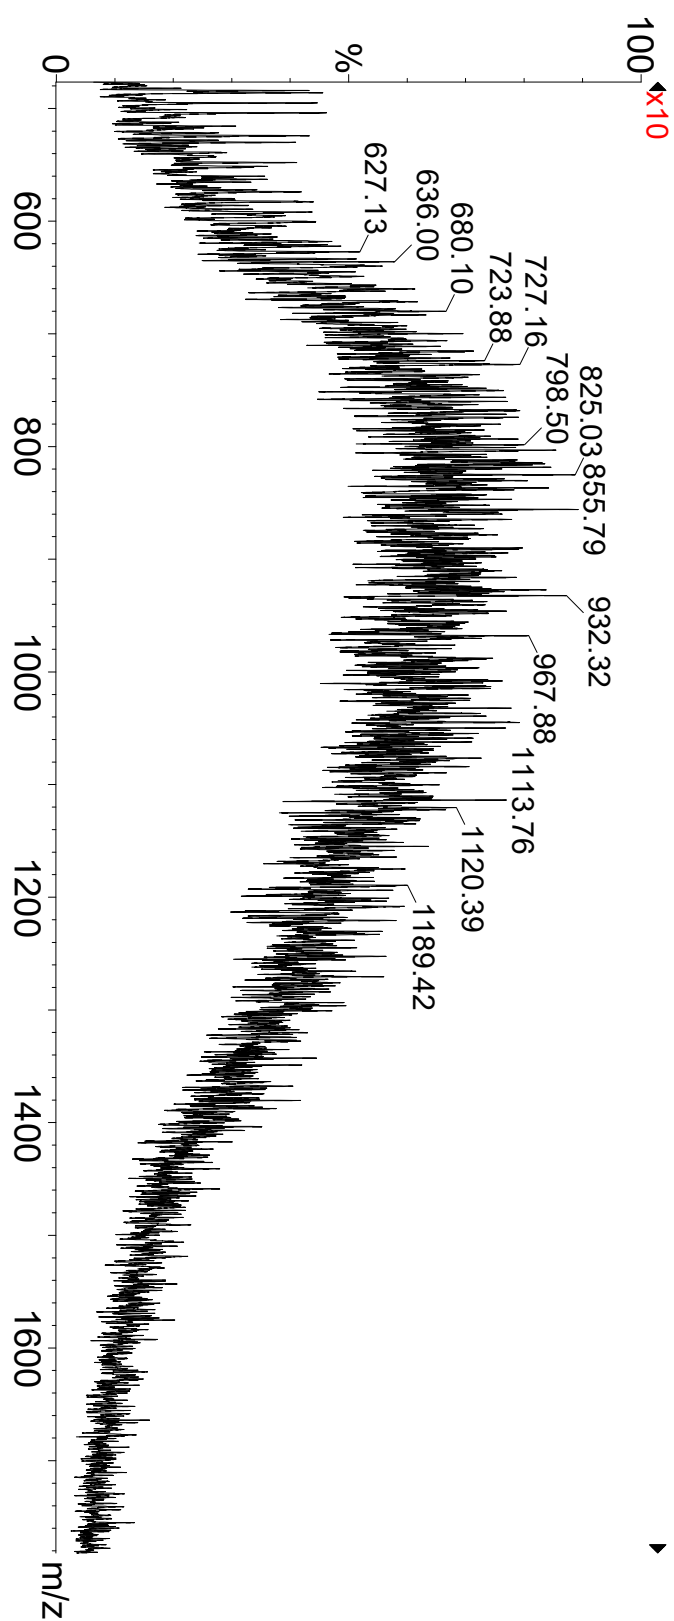

**Figure S23.** ESI-MS of di-3-mercaptopropionyl pluronic (**21**);  $M + 14H/14$ ,  $M + 15H/15$ .



## 6. Real-time monitoring of the reaction progress between pre-formed PC-Lip-Mal and PEG-dithiol using 1D-CPMG $^1\text{H}$ -NMR

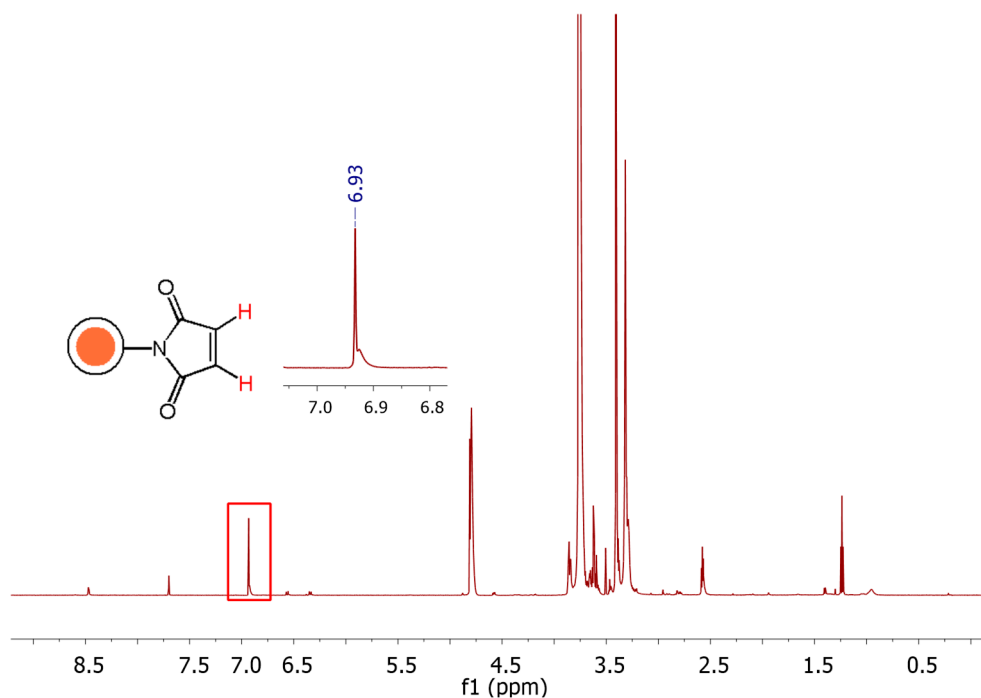

**Figure S24.**  $^1\text{H}$ -NMR spectrum of PC/Chol/DSPE-PEG2000-Mal (2:1:0.03) mol/mol liposomes in  $\text{D}_2\text{O}$  using CPMG pulse sequence at 700 MHz,  $T = 27^\circ\text{C}$ . The lipid concentration was adjusted at 20 mg/mL (in  $\text{D}_2\text{O}$ ).

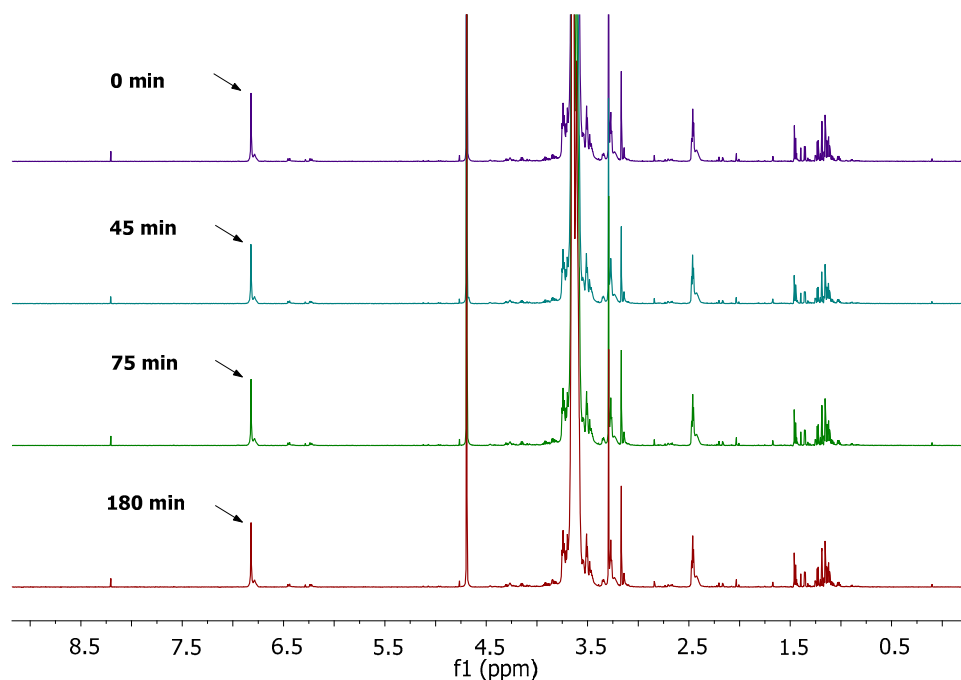

**Figure S25.**  $^1\text{H}$ -NMR analysis of PC/Chol/DSPE-PEG2000-Mal (2:1:0.03) mol/mol liposomes in  $\text{D}_2\text{O}$  using CPMG pulse sequence at 700 MHz,  $T = 27^\circ\text{C}$ , at  $t = 0, 45, 75, 180$  min. The lipid concentration was adjusted at 20 mg/mL (in  $\text{D}_2\text{O}$ ).

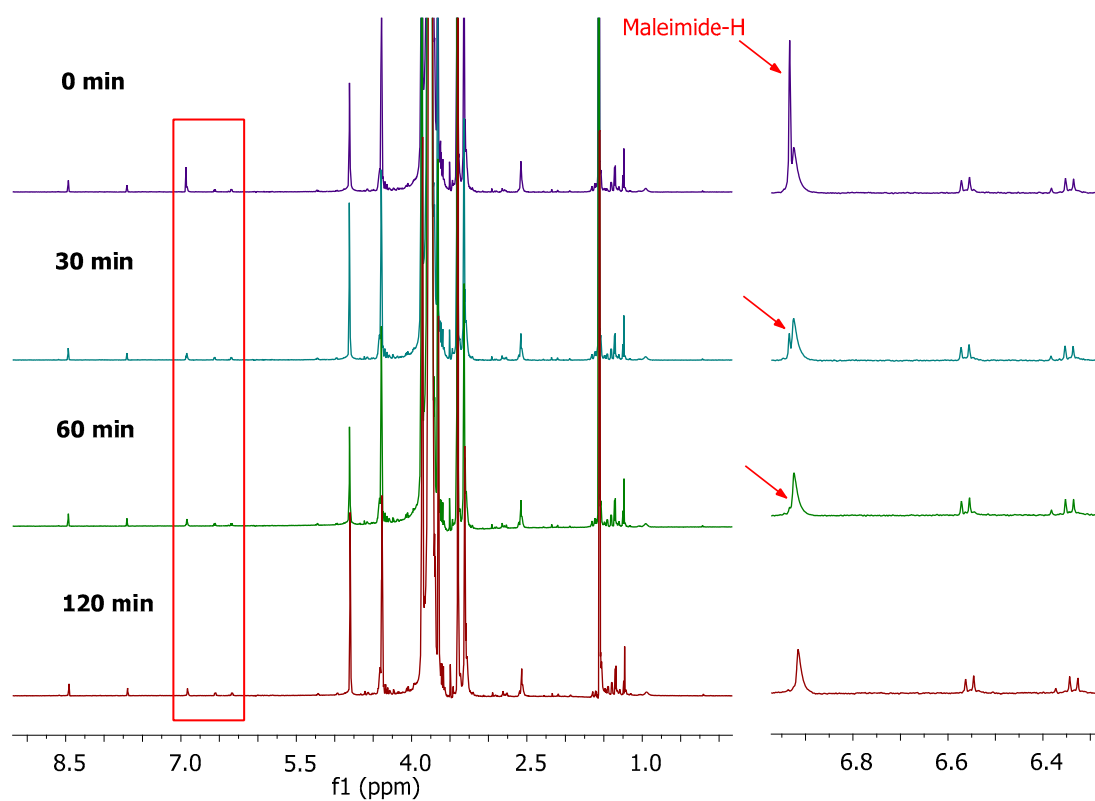

**Figure S26.** Real-time monitoring of the reaction progress between pre-formed PC-Lip-Mal and PEG-dithiol in D<sub>2</sub>O using <sup>1</sup>H-NMR CPMG pulse sequence at 700 MHz, T = 27 °C. The lipid concentration was adjusted at 20 mg/mL (in D<sub>2</sub>O).

## 7. Liposome physicochemical data before and after cross-linking reaction

### 7.1 Size distribution graphs for HPC-Lip-Mal before and after their reaction with PEG-dithiol.

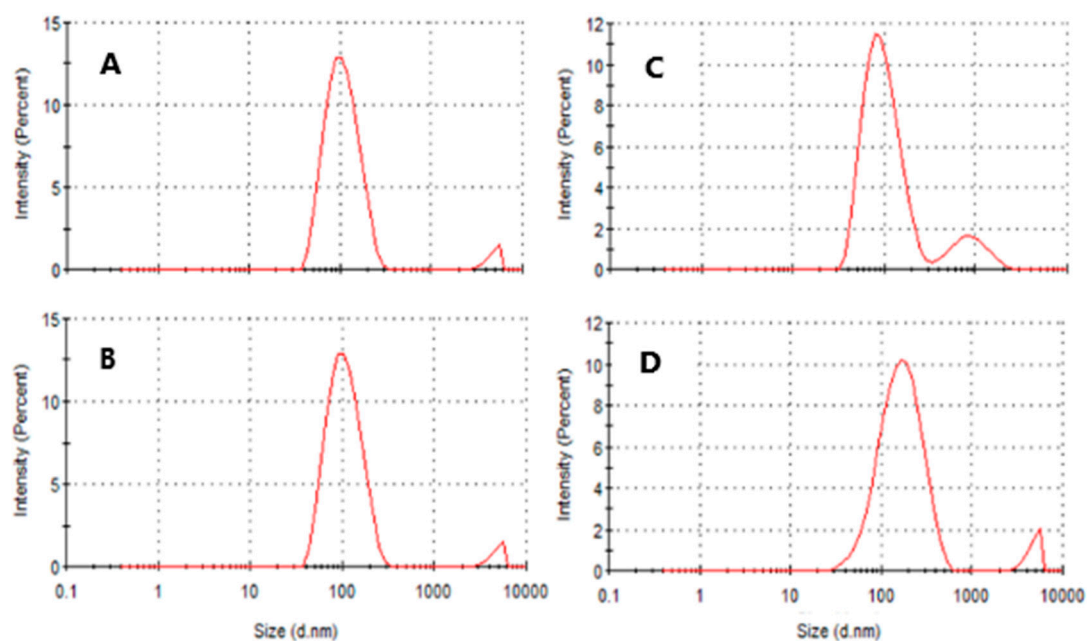

**Figure S27.** Size distribution before (A) and after reaction (B) for control liposomes. Size distribution before (C) and after reaction (D) for Lips-Mal.

8. Calcein Release from the liposomal structures in PBS

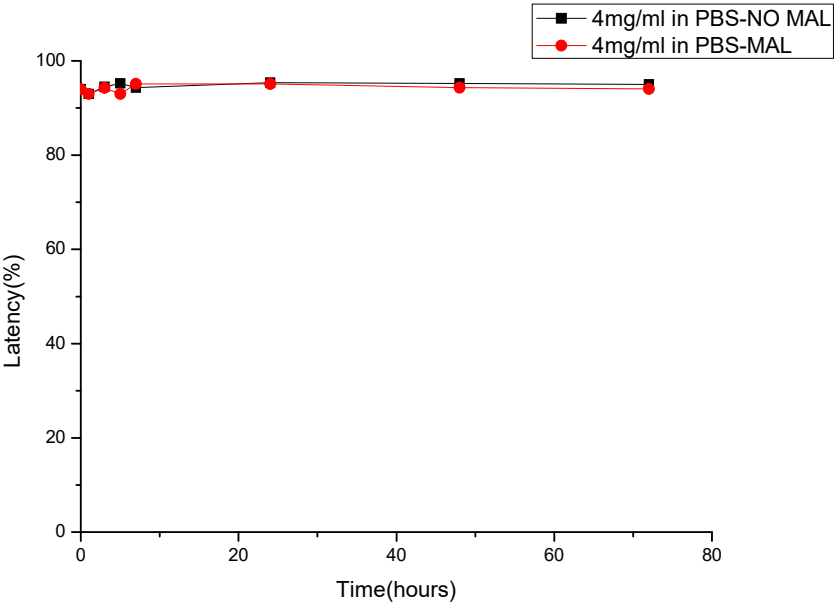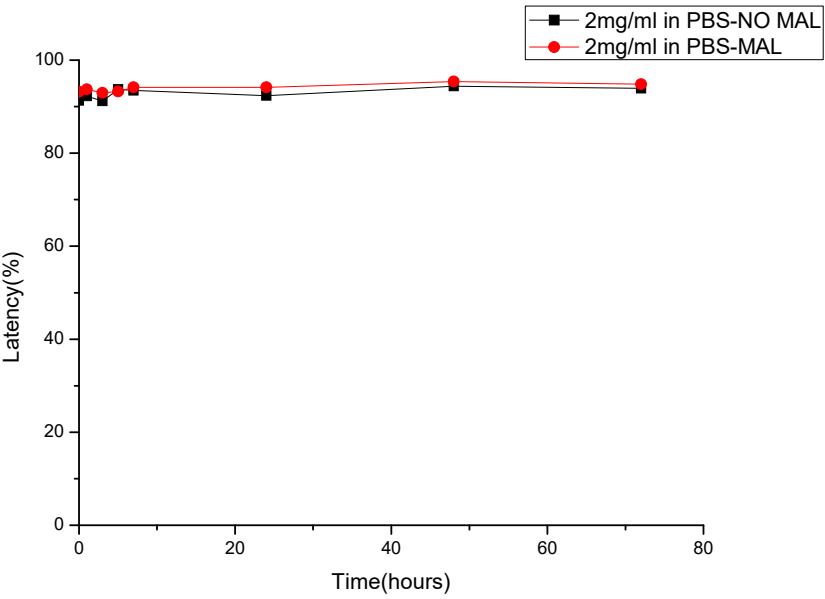

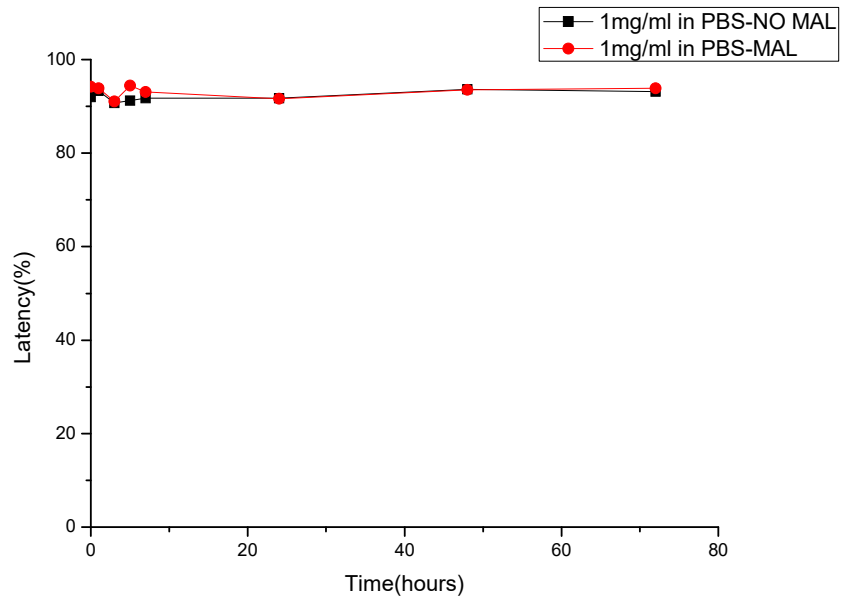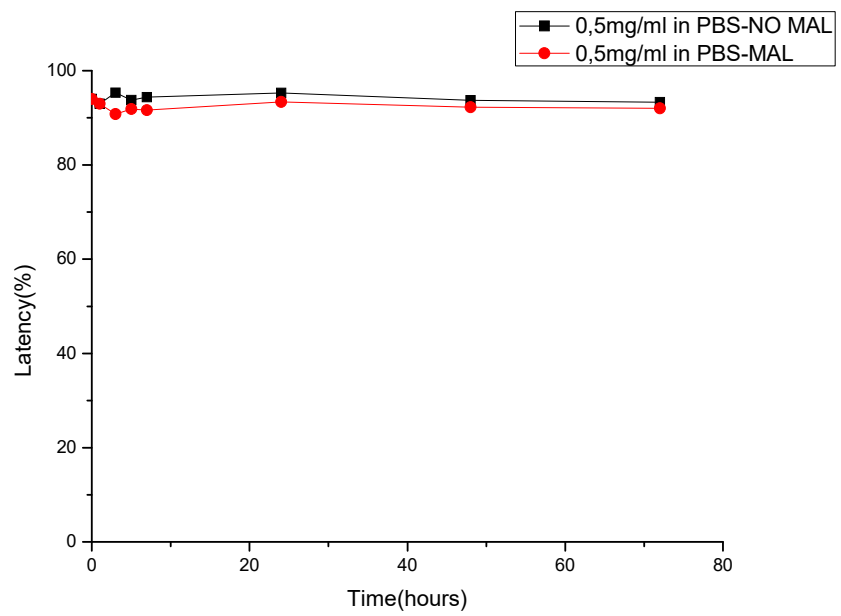

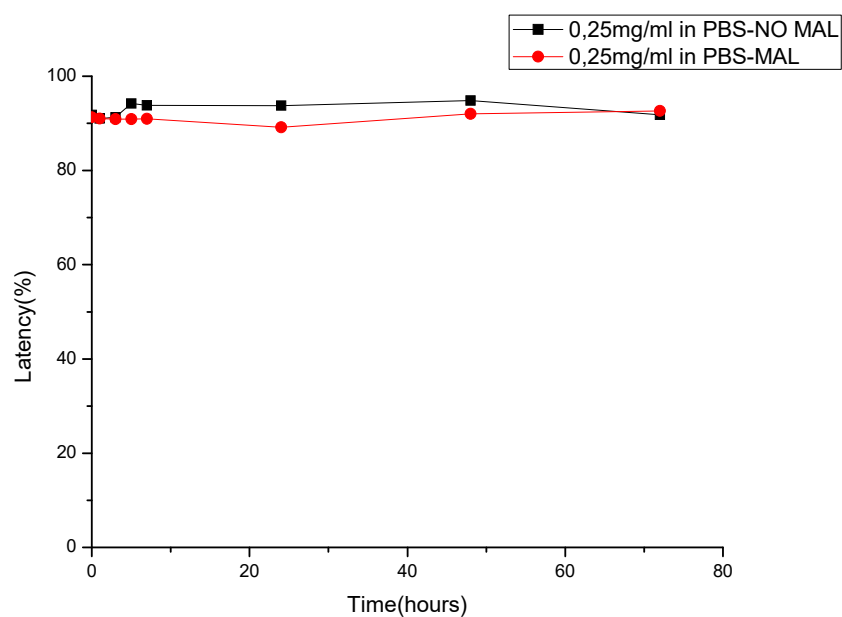

**Figure S28.** % Latency of calcein by the incubation of liposomes in PBS pH 7.40 at 37 °C. Control liposomes (HPC-Lip; PBS-NO MAL) and thioether cross-linked liposomes (HPC-LIP-di-thioether-PEG; PBS-MAL) at different concentrations (4.0 mg/mL, 2.0 mg/mL, 1.0 mg/mL, 0.5 mg/mL and 0.25 mg/mL).
